# Supplementary material for: Genetic diversity and accession structure in European Cynara cardunculus collections
Source: PLoS One. 2017 Jun 1;12(6):e0178770. doi: 10.1371/journal.pone.0178770 (PMC5453587; doi:10.1371/journal.pone.0178770)
Supplement: S2 Table — (DOCX) [file pone.0178770.s004.docx]

S2 Table. ISSR primers and their annealing temperatures (T).

Primer Sequence 3’-5’ T (°C)

810 (GA)8T 43

818 (CA)8 G 54

827 (AC)8G 52

834 (AG)8YT 45

840 (GA)8YT 50

841 (GA) 8YC 45

855 (CA) 8RC 54

857 (AC) 8YG 54

857C (AC) 8YGC 59

857G (AC) 8YGG 58

872 (GATA)4 45

Y = Pyrimidine; R = Purine
